# Supplementary material
Source: PubMed Central journal article supplement (PMC2925729)
Supplement: blood-2009-06-229898_1.pdf [file blood-2009-06-229898_1.pdf]

| <b>CD38 expression</b>  |                       |                       |                    |                |
|-------------------------|-----------------------|-----------------------|--------------------|----------------|
| <b>miRNA probe set</b>  | <b>CD38 negative</b>  | <b>CD38 positive</b>  | <b>fold change</b> | <b>p value</b> |
| HS_35                   | 1378,85               | 1917,27               | 1,39               | 0,039384       |
| hsa-miR-338             | 983,74                | 3045,47               | 3,1                | 0,027464       |
| hsa-miR-660             | 2170,12               | 1613,13               | -1,35              | 0,000541 *     |
| hsa-miR-146b            | 6635,09               | 4242                  | -1,56              | 0,00488        |
| hsa-miR-625             | 9003,65               | 6331                  | -1,42              | 0,002569       |
| hsa-miR-142-5p          | 13880,79              | 19325,93              | 1,39               | 0,027964       |
| <b>IgVH-status</b>      |                       |                       |                    |                |
| <b>miRNA probe set</b>  | <b>mutated</b>        | <b>unmutated</b>      | <b>fold change</b> | <b>p value</b> |
| hsa-miR-500             | 1580,68               | 1049,8                | -1,51              | 0,008381       |
| hsa-miR-339             | 3494,32               | 2753,1                | -1,27              | 0,046389       |
| hsa-miR-132             | 3995,74               | 5288,2                | 1,32               | 0,01786        |
| hsa-miR-146b            | 6358,26               | 3031,5                | -2,1               | 0,000042 *     |
| hsa-miR-342             | 11967,53              | 9794,6                | -1,22              | 0,005164       |
| <b>ZAP70-expression</b> |                       |                       |                    |                |
| <b>miRNA probe set</b>  | <b>ZAP70 negative</b> | <b>ZAP70 positive</b> | <b>fold change</b> | <b>p value</b> |
| hsa-miR-363             | 1606,71               | 2415,68               | 1,5                | 0,008557       |
| hsa-miR-20b             | 1646,57               | 2872,79               | 1,74               | 0,001869       |
| hsa-miR-17-5p           | 2573,38               | 3228,96               | 1,25               | 0,012763       |
| hsa-miR-17-3p           | 3054,1                | 3727,54               | 1,22               | 0,013718       |
| hsa-miR-18a             | 3883,57               | 4720,46               | 1,22               | 0,049749       |

\* significant after Bonferroni's correction for multiple testing
