# Supplementary material
Source: PubMed Central journal article supplement (PMC2925729)
Supplement: blood-2009-06-229898_3.pdf [file blood-2009-06-229898_3.pdf]

| <b>GO-Term</b>                                                                      | <b>p-value</b> |
|-------------------------------------------------------------------------------------|----------------|
| biopolymer metabolic process                                                        | 1,14E-06       |
| regulation of gene expression                                                       | 1,33E-06       |
| macromolecule metabolic process                                                     | 2,59E-06       |
| binding                                                                             | 5,57E-06       |
| regulation of macromolecule biosynthetic process                                    | 5,57E-06       |
| regulation of cellular metabolic process                                            | 5,57E-06       |
| cellular metabolic process                                                          | 5,57E-06       |
| primary metabolic process                                                           | 5,57E-06       |
| regulation of biosynthetic process                                                  | 6,96E-06       |
| RNA metabolic process                                                               | 7,35E-06       |
| regulation of metabolic process                                                     | 8,38E-06       |
| nucleic acid binding                                                                | 8,78E-06       |
| regulation of nucleobase, nucleoside, nucleotide and nucleic acid metabolic process | 1,12E-05       |
| regulation of macromolecule metabolic process                                       | 1,20E-05       |
| gene expression                                                                     | 1,26E-05       |
| cellular macromolecule biosynthetic process                                         | 1,51E-05       |
| macromolecule biosynthetic process                                                  | 1,51E-05       |
| regulation of transcription                                                         | 2,82E-05       |
| transcription                                                                       | 2,82E-05       |
| transcription factor activity                                                       | 3,58E-05       |
| metabolic process                                                                   | 3,58E-05       |
| regulation of RNA metabolic process                                                 | 3,58E-05       |
| transcription, DNA-dependent                                                        | 4,58E-05       |
| transcription regulator activity                                                    | 4,58E-05       |
| cellular biopolymer biosynthetic process                                            | 4,58E-05       |
| biopolymer biosynthetic process                                                     | 4,58E-05       |
| DNA binding                                                                         | 4,73E-05       |
| nucleobase, nucleoside, nucleotide and nucleic acid metabolic process               | 5,16E-05       |
| regulation of transcription, DNA-dependent                                          | 5,51E-05       |
| regulation of cellular process                                                      | 6,34E-05       |
| nucleus                                                                             | 7,86E-05       |
| transmembrane receptor protein serinethreonine kinase activity 54                   | 8,05E-05       |
| transforming growth factor beta receptor activity                                   | 8,05E-05       |
| cellular biopolymer metabolic process                                               | 8,05E-05       |
| regulation of biological process                                                    | 8,48E-05       |
| transmembrane receptor protein kinase activity                                      | 0,00011        |
| cellular biosynthetic process                                                       | 0,00014        |
